# Supplementary material for: Transcriptome Sequencing and iTRAQ of Different Rice Cultivars Provide Insight into Molecular Mechanisms of Cold-Tolerance Response in Japonica Rice
Source: PubMed Central journal article supplement (PMC7310054; doi:10.1186/s12284-020-00401-8), 2020-06-22

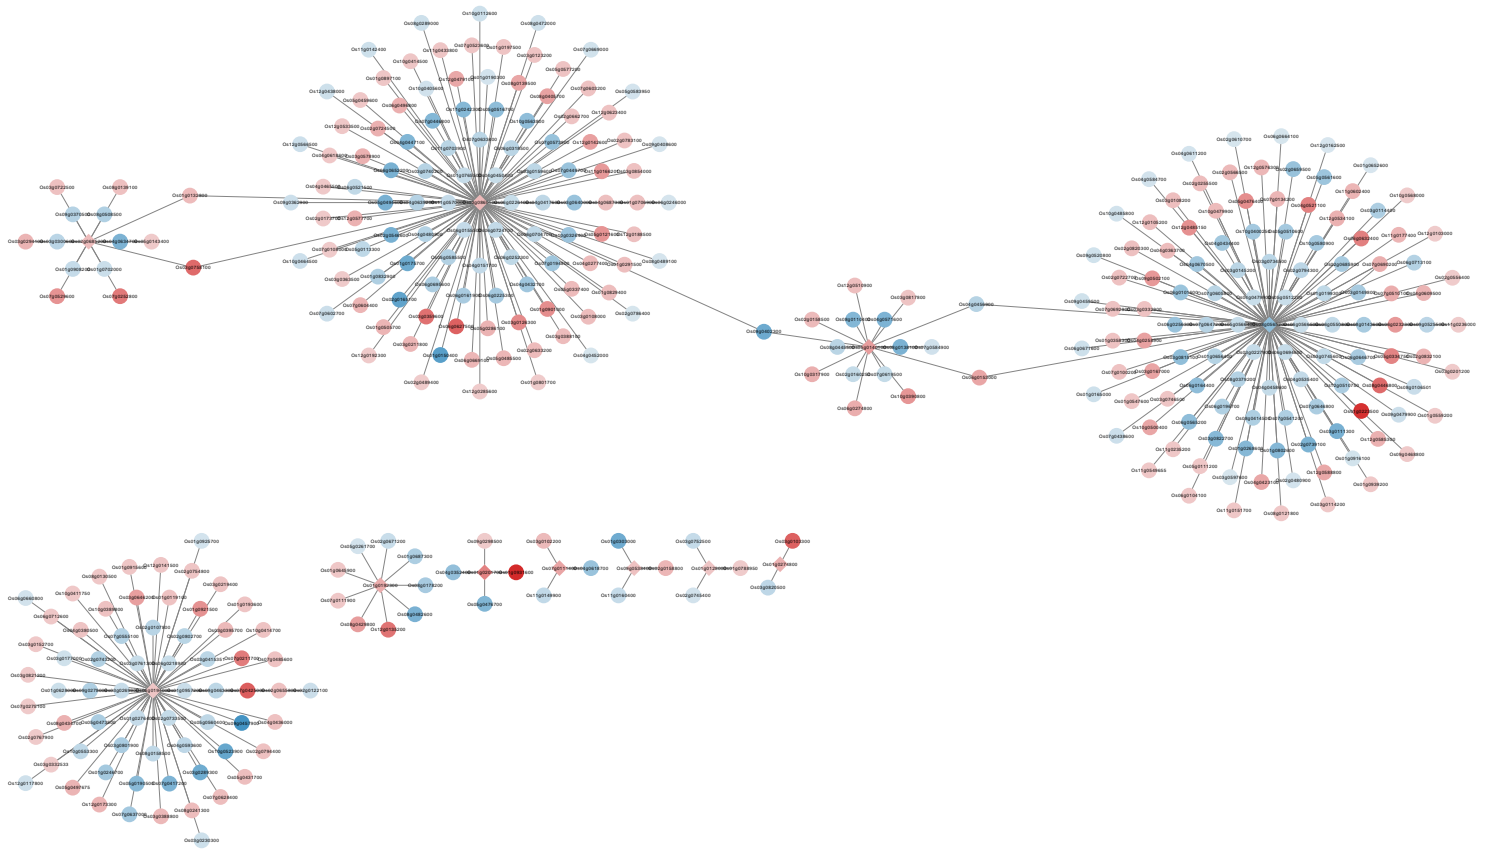

Supplement: 12284_2020_401_MOESM4_ESM.pdf [file 12284_2020_401_MOESM4_ESM.pdf]
